# Supplementary material
Source: PubMed Central journal article supplement (PMC7963718)
Supplement: 16-01184.pdf [file 16-01184.pdf]

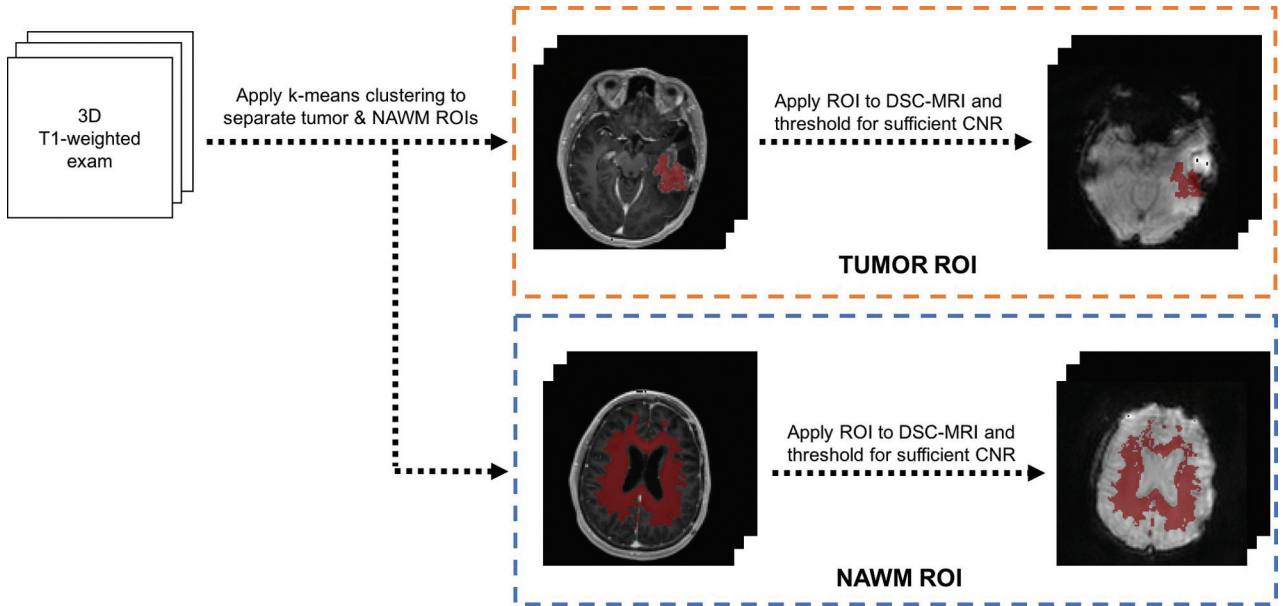

**ON-LINE FIGURE.** An illustration of the ROI selection process for the tumor and NAWM ROIs as outlined within the “Materials and Methods” section.
